# Supplementary material for: Kinetic studies of reactions of the nitrate radical (NO3) with peroxy radicals (RO2): an indirect source of OH at night?
Source: Royal Society of Chemistry journal article supplement (doi:10.1039/b605569a), 2006-01-01
Supplement: b605569a.pdf [file b605569a.pdf]

## **Reactions and rate constants used in the peroxy models**

## II.1 Chemistry of the CH<sub>3</sub>O<sub>2</sub> system

| Reaction                                                                                                            | $k / \text{cm}^3 \text{ molecule}^{-1} \text{ s}^{-1}$ | Reference                     |
|---------------------------------------------------------------------------------------------------------------------|--------------------------------------------------------|-------------------------------|
| $\text{F} + \text{CH}_4 \rightarrow \text{HF} + \text{CH}_3$                                                        | $6.4 \times 10^{-11}$                                  | Atkinson <i>et al.</i> (2005) |
| $\text{CH}_3 + \text{CH}_3 \rightarrow \text{CH}_3\text{CH}_3$                                                      | $4 \times 10^{-11}$                                    | Wang and Fockenberg (2001)    |
| $\text{CH}_3 + \text{O}_2 \rightarrow \text{CH}_3\text{O}_2$                                                        | $6 \times 10^{-14}$ at 6 Torr                          | Sander <i>et al.</i> (2003)   |
| $\text{CH}_3 + \text{CH}_3\text{O}_2 \rightarrow \text{CH}_3\text{O} + \text{CH}_3\text{O}$                         | $(1 - 4) \times 10^{-11}$                              | varied                        |
| $\text{CH}_3\text{O}_2 + \text{CH}_3\text{O}_2 \rightarrow \text{CH}_3\text{O} + \text{CH}_3\text{O} + \text{O}_2$  | $1.3 \times 10^{-13}$                                  | Atkinson <i>et al.</i> (2005) |
| $\text{CH}_3\text{O}_2 + \text{CH}_3\text{O}_2 \rightarrow \text{CH}_2\text{O} + \text{CH}_3\text{OH} + \text{O}_2$ | $2.4 \times 10^{-13}$                                  | Atkinson <i>et al.</i> (2005) |
| $\text{CH}_3\text{O}_2 + \text{CH}_3\text{O} \rightarrow \text{products}$                                           | $4 \times 10^{-12}$                                    | estimated                     |
| $\text{CH}_3\text{O} + \text{CH}_3\text{O} \rightarrow \text{products}$                                             | $1.3 \times 10^{-11}$                                  | Biggs <i>et al.</i> (1997)    |
| $\text{CH}_3\text{O} \rightarrow \text{products}$                                                                   | $0 - 50 \text{ s}^{-1}$                                | varied                        |
| $\text{CH}_3\text{O}_2 \rightarrow \text{products}$                                                                 | $5 - 7 \text{ s}^{-1}$                                 | varied                        |
| $\text{F} + \text{CH}_3\text{O}_2 \rightarrow \text{FO} + \text{CH}_3\text{O}$                                      | $(1 - 5) \times 10^{-10}$                              | estimated and varied          |
| $\text{FO} + \text{FO} \rightarrow \text{F} + \text{F} + \text{O}_2$                                                | $1 \times 10^{-11}$                                    | Sander <i>et al.</i> (2003)   |
| $\text{CH}_3\text{O} + \text{O}_2 \rightarrow \text{CH}_2\text{O} + \text{HO}_2$                                    | $1.9 \times 10^{-15}$                                  | Atkinson <i>et al.</i> (2005) |
| $\text{CH}_3\text{O}_2 + \text{HO}_2 \rightarrow \text{CH}_3\text{O}_2\text{H} + \text{O}_2$                        | $5.2 \times 10^{-12}$                                  | Atkinson <i>et al.</i> (2005) |
| $\text{HO}_2 + \text{HO}_2 \rightarrow \text{H}_2\text{O}_2 + \text{O}_2$                                           | $1.7 \times 10^{-12}$                                  | Atkinson <i>et al.</i> (2005) |
| $\text{CH}_3\text{O}_2 + \text{NO} \rightarrow \text{NO}_2 + \text{CH}_3\text{O}$                                   | $7.7 \times 10^{-12}$                                  | Atkinson <i>et al.</i> (2005) |
| $\text{CH}_3\text{O} + \text{NO} \rightarrow \text{products}$                                                       | $5 \times 10^{-12}$                                    | Daële <i>et al.</i> (1995)    |
| $\text{FO} + \text{NO} \rightarrow \text{F} + \text{NO}_2$                                                          | $2.2 \times 10^{-11}$                                  | Atkinson <i>et al.</i> (2005) |
| $\text{HO}_2 + \text{NO} \rightarrow \text{OH} + \text{NO}_2$                                                       | $8.5 \times 10^{-12}$                                  | Atkinson <i>et al.</i> (2005) |
| $\text{OH} + \text{NO} \rightarrow \text{products}$                                                                 | $1 \times 10^{-13}$ at 5 Torr                          | Atkinson <i>et al.</i> (2005) |
| $\text{OH} + \text{CH}_4 \rightarrow \text{H}_2\text{O} + \text{CH}_3$                                              | $6.3 \times 10^{-15}$                                  | Sander <i>et al.</i> (2003)   |
| $\text{CH}_3 + \text{NO} \rightarrow \text{products}$                                                               | $3 \times 10^{-13}$                                    | Vakhtin and. Petrov (1991)    |
| $\text{HO}_2 + \text{OH} \rightarrow \text{H}_2\text{O} + \text{O}_2$                                               | $1 \times 10^{-10}$                                    | Atkinson <i>et al.</i> (2005) |
| $\text{OH} \rightarrow \text{products}$                                                                             | $0 - 10 \text{ s}^{-1}$                                | determined experimentally     |
| $\text{NO}_3 + \text{CH}_3\text{O}_2 \rightarrow \text{NO}_2 + \text{CH}_3\text{O} + \text{O}_2$                    | $(0.1 - 2.0) \times 10^{-12}$                          | varied                        |
| $\text{NO}_3 + \text{CH}_3\text{O} \rightarrow \text{NO}_2 + \text{CH}_3\text{O}_2$                                 | $(1.5 - 3.5) \times 10^{-12}$                          | varied                        |
| $\text{NO}_3 + \text{HO}_2 \rightarrow \text{NO}_2 + \text{OH} + \text{O}_2$                                        | $3.5 \times 10^{-12}$                                  | Atkinson <i>et al.</i> (2005) |
| $\text{NO}_3 \rightarrow \text{products}$                                                                           | $0 \text{ s}^{-1}$                                     | determined experimentally     |

## II.2 Chemistry of the C<sub>2</sub>H<sub>5</sub>O<sub>2</sub> system

| Reaction                                                                                                                                                | $k / \text{cm}^3 \text{ molecule}^{-1} \text{ s}^{-1}$ | Reference                     |
|---------------------------------------------------------------------------------------------------------------------------------------------------------|--------------------------------------------------------|-------------------------------|
| $\text{F} + \text{C}_2\text{H}_6 \rightarrow \text{HF} + \text{C}_2\text{H}_5$                                                                          | $1.7 \times 10^{-10}$                                  | Persky (2003)                 |
| $\text{C}_2\text{H}_5 + \text{C}_2\text{H}_5 \rightarrow \text{products}$                                                                               | $2 \times 10^{-11}$                                    | Baulch <i>et al.</i> (1992)   |
| $\text{C}_2\text{H}_5 + \text{O}_2 \rightarrow \text{C}_2\text{H}_5\text{O}_2$                                                                          | $(2 - 4.2) \times 10^{-12}$ at 6 Torr                  | varied, Plumb and Ryan (1981) |
| $\text{C}_2\text{H}_5 + \text{O}_2 \rightarrow \text{C}_2\text{H}_4 + \text{HO}_2$                                                                      | $(1 - 2) \times 10^{-13}$ at 6 Torr                    | varied, Plumb and Ryan (1981) |
| $\text{C}_2\text{H}_5 + \text{C}_2\text{H}_5\text{O}_2 \rightarrow \text{C}_2\text{H}_5\text{O} + \text{C}_2\text{H}_5\text{O}$                         | $(2.3 - 40) \times 10^{-12}$                           | varied                        |
| $\text{C}_2\text{H}_5\text{O}_2 + \text{C}_2\text{H}_5\text{O}_2 \rightarrow \text{C}_2\text{H}_5\text{O} + \text{C}_2\text{H}_5\text{O} + \text{O}_2$  | $4.3 \times 10^{-14}$                                  | Atkinson <i>et al.</i> (2005) |
| $\text{C}_2\text{H}_5\text{O}_2 + \text{C}_2\text{H}_5\text{O}_2 \rightarrow \text{C}_2\text{H}_4\text{O} + \text{C}_2\text{H}_5\text{OH} + \text{O}_2$ | $2.5 \times 10^{-14}$                                  | Atkinson <i>et al.</i> (2005) |
| $\text{C}_2\text{H}_5\text{O}_2 + \text{C}_2\text{H}_5\text{O} \rightarrow \text{products}$                                                             | $2 \times 10^{-12}$                                    | estimated                     |
| $\text{C}_2\text{H}_5\text{O} + \text{C}_2\text{H}_5\text{O} \rightarrow \text{products}$                                                               | $1.5 \times 10^{-11}$                                  | estimated                     |
| $\text{C}_2\text{H}_5\text{O} \rightarrow \text{products}$                                                                                              | $0 - 50 \text{ s}^{-1}$                                | varied                        |
| $\text{C}_2\text{H}_5\text{O}_2 \rightarrow \text{products}$                                                                                            | $4 - 7 \text{ s}^{-1}$                                 | varied                        |
| $\text{F} + \text{C}_2\text{H}_5\text{O}_2 \rightarrow \text{FO} + \text{C}_2\text{H}_5\text{O}$                                                        | $(1 - 5) \times 10^{-10}$                              | varied                        |
| $\text{FO} + \text{FO} \rightarrow \text{F} + \text{F} + \text{O}_2$                                                                                    | $1 \times 10^{-11}$                                    | Sander <i>et al.</i> (2003)   |
| $\text{C}_2\text{H}_5\text{O} + \text{O}_2 \rightarrow \text{C}_2\text{H}_4\text{O} + \text{HO}_2$                                                      | $8.1 \times 10^{-15}$                                  | Atkinson <i>et al.</i> (2005) |
| $\text{C}_2\text{H}_5\text{O}_2 + \text{HO}_2 \rightarrow \text{C}_2\text{H}_5\text{O}_2\text{H} + \text{O}_2$                                          | $8 \times 10^{-12}$                                    | Atkinson <i>et al.</i> (2005) |
| $\text{HO}_2 + \text{HO}_2 \rightarrow \text{H}_2\text{O}_2 + \text{O}_2$                                                                               | $1.7 \times 10^{-12}$                                  | Atkinson <i>et al.</i> (2005) |
| $\text{C}_2\text{H}_5\text{O}_2 + \text{NO} \rightarrow \text{NO}_2 + \text{C}_2\text{H}_5\text{O}$                                                     | $9.2 \times 10^{-12}$                                  | Atkinson <i>et al.</i> (2005) |
| $\text{C}_2\text{H}_5\text{O} + \text{NO} \rightarrow \text{products}$                                                                                  | $1.5 \times 10^{-11}$                                  | Atkinson <i>et al.</i> (2005) |
| $\text{FO} + \text{NO} \rightarrow \text{F} + \text{NO}_2$                                                                                              | $2.2 \times 10^{-11}$                                  | Atkinson <i>et al.</i> (2005) |
| $\text{HO}_2 + \text{NO} \rightarrow \text{OH} + \text{NO}_2$                                                                                           | $8.5 \times 10^{-12}$                                  | Atkinson <i>et al.</i> (2005) |
| $\text{OH} + \text{NO} \rightarrow \text{products}$                                                                                                     | $1 \times 10^{-13}$ at 5 Torr                          | Atkinson <i>et al.</i> (2005) |
| $\text{OH} + \text{C}_2\text{H}_6 \rightarrow \text{H}_2\text{O} + \text{C}_2\text{H}_5$                                                                | $2.4 \times 10^{-13}$                                  | Atkinson <i>et al.</i> (2005) |
| $\text{C}_2\text{H}_5 + \text{NO} \rightarrow \text{products}$                                                                                          | $(3 - 100) \times 10^{-13}$                            | varied                        |
| $\text{HO}_2 + \text{OH} \rightarrow \text{H}_2\text{O} + \text{O}_2$                                                                                   | $1 \times 10^{-10}$                                    | Atkinson <i>et al.</i> (2005) |
| $\text{OH} \rightarrow \text{products}$                                                                                                                 | $0 - 10 \text{ s}^{-1}$                                | determined experimentally     |
| $\text{NO}_3 + \text{C}_2\text{H}_5\text{O}_2 \rightarrow \text{NO}_2 + \text{C}_2\text{H}_5\text{O}_2$                                                 | $(0.5 - 6.0) \times 10^{-12}$                          | varied                        |
| $\text{NO}_3 + \text{C}_2\text{H}_5\text{O} \rightarrow \text{NO}_2 + \text{C}_2\text{H}_5\text{O}_2$                                                   | $(1.5 - 3.5) \times 10^{-12}$                          | varied                        |
| $\text{NO}_3 + \text{HO}_2 \rightarrow \text{NO}_2 + \text{OH} + \text{O}_2$                                                                            | $3.5 \times 10^{-12}$                                  | Atkinson <i>et al.</i> (2005) |
| $\text{NO}_3 \rightarrow \text{products}$                                                                                                               | $0 \text{ s}^{-1}$                                     | determined experimentally     |

## II.3 Chemistry of the CH<sub>2</sub>FO<sub>2</sub> system

| Reaction                                                                                                               | $k / \text{cm}^3 \text{ molecule}^{-1} \text{ s}^{-1}$ | Reference                                                   |
|------------------------------------------------------------------------------------------------------------------------|--------------------------------------------------------|-------------------------------------------------------------|
| $\text{F} + \text{CH}_3\text{F} \rightarrow \text{HF} + \text{CH}_2\text{F}$                                           | $3 \times 10^{-11}$                                    | Moore and Smith (1995)                                      |
| $\text{CH}_2\text{F} + \text{CH}_2\text{F} \rightarrow \text{CH}_2\text{FCH}_2\text{F}$                                | $1.3 \times 10^{-11}$                                  | Beiderhase <i>et al.</i> (1995)                             |
| $\text{CH}_2\text{F} + \text{O}_2 \rightarrow \text{CH}_2\text{FO}_2$                                                  | $(1 - 2) \times 10^{-13}$ at 5 Torr                    | estimated and varied                                        |
| $\text{CH}_2\text{F} + \text{CH}_2\text{FO}_2 \rightarrow \text{CH}_2\text{FO} + \text{CH}_2\text{FO}$                 | $(1 - 2) \times 10^{-11}$                              | estimated and varied                                        |
| $\text{CH}_2\text{FO}_2 + \text{CH}_2\text{FO}_2 \rightarrow \text{CH}_2\text{FO} + \text{CH}_2\text{FO} + \text{O}_2$ | $2 \times 10^{-12}$                                    | Atkinson <i>et al.</i> (2005),<br>estimated branching ratio |
| $\text{CH}_2\text{FO}_2 + \text{CH}_2\text{FO}_2 \rightarrow$<br>$\text{HC(O)F} + \text{CH}_2\text{FOH} + \text{O}_2$  | $1 \times 10^{-12}$                                    | Atkinson <i>et al.</i> (2005),<br>estimated branching ratio |
| $\text{CH}_2\text{FO}_2 + \text{CH}_2\text{FO} \rightarrow \text{products}$                                            | $(0.4 - 1.4) \times 10^{-11}$                          | varied                                                      |
| $\text{CH}_2\text{FO} + \text{CH}_2\text{FO} \rightarrow \text{products}$                                              | $1.3 \times 10^{-11}$                                  | estimate                                                    |
| $\text{CH}_2\text{FO} \rightarrow \text{products}$                                                                     | $0 - 50 \text{ s}^{-1}$                                | varied                                                      |
| $\text{CH}_2\text{FO}_2 \rightarrow \text{products}$                                                                   | $0 - 3 \text{ s}^{-1}$                                 | varied                                                      |
| $\text{F} + \text{CH}_2\text{FO}_2 \rightarrow \text{FO} + \text{CH}_2\text{FO}$                                       | $(1 - 5) \times 10^{-10}$                              | estimated and varied                                        |
| $\text{FO} + \text{FO} \rightarrow \text{F} + \text{F} + \text{O}_2$                                                   | $1 \times 10^{-11}$                                    | Sander <i>et al.</i> (2003)                                 |
| $\text{CH}_2\text{FO} + \text{O}_2 \rightarrow \text{HC(O)F} + \text{HO}_2$                                            | $(5 - 8) \times 10^{-14}$                              | estimated and varied                                        |
| $\text{CH}_2\text{FO}_2 + \text{HO}_2 \rightarrow \text{products}$                                                     | $5.0 \times 10^{-12}$                                  | estimated                                                   |
| $\text{HO}_2 + \text{HO}_2 \rightarrow \text{H}_2\text{O}_2 + \text{O}_2$                                              | $1.7 \times 10^{-12}$                                  | Atkinson <i>et al.</i> (2005)                               |
| $\text{CH}_2\text{FO}_2 + \text{NO} \rightarrow \text{NO}_2 + \text{CH}_2\text{FO}$                                    | $1.3 \times 10^{-11}$                                  | Atkinson <i>et al.</i> (2005)                               |
| $\text{CH}_2\text{FO} + \text{NO} \rightarrow \text{products}$                                                         | $5 \times 10^{-12}$                                    | estimated                                                   |
| $\text{FO} + \text{NO} \rightarrow \text{F} + \text{NO}_2$                                                             | $2.2 \times 10^{-11}$                                  | Atkinson <i>et al.</i> (2005)                               |
| $\text{HO}_2 + \text{NO} \rightarrow \text{OH} + \text{NO}_2$                                                          | $8.5 \times 10^{-12}$                                  | Atkinson <i>et al.</i> (2005)                               |
| $\text{OH} + \text{NO} \rightarrow \text{products}$                                                                    | $1 \times 10^{-13}$ at 5 Torr                          | Atkinson <i>et al.</i> (2005)                               |
| $\text{OH} + \text{CH}_3\text{F} \rightarrow \text{H}_2\text{O} + \text{CH}_2\text{F}$                                 | $2 \times 10^{-14}$                                    | Atkinson <i>et al.</i> (2005)                               |
| $\text{CH}_2\text{F} + \text{NO} \rightarrow \text{products}$                                                          | $3 \times 10^{-13}$                                    | estimated                                                   |
| $\text{HO}_2 + \text{OH} \rightarrow \text{H}_2\text{O} + \text{O}_2$                                                  | $1 \times 10^{-10}$                                    | Atkinson <i>et al.</i> (2005)                               |
| $\text{OH} \rightarrow \text{products}$                                                                                | $0 - 10 \text{ s}^{-1}$                                | determined experimentally                                   |
| $\text{NO}_3 + \text{CH}_2\text{FO}_2 \rightarrow \text{NO}_2 + \text{CH}_2\text{FO} + \text{O}_2$                     | $(0.1 - 4.0) \times 10^{-12}$                          | varied                                                      |
| $\text{NO}_3 + \text{CH}_2\text{FO} \rightarrow \text{NO}_2 + \text{CH}_2\text{FO}_2$                                  | $(2 - 4) \times 10^{-12}$                              | varied                                                      |
| $\text{NO}_3 + \text{HO}_2 \rightarrow \text{NO}_2 + \text{OH} + \text{O}_2$                                           | $3.5 \times 10^{-12}$                                  | Atkinson <i>et al.</i> (2005)                               |
| $\text{NO}_3 \rightarrow \text{products}$                                                                              | $0 \text{ s}^{-1}$                                     | determined experimentally                                   |

## II.4 Chemistry of the CH<sub>2</sub>ClO<sub>2</sub> system

| Reaction                                                                                                                   | $k / \text{cm}^3 \text{ molecule}^{-1} \text{ s}^{-1}$ | Reference                       |
|----------------------------------------------------------------------------------------------------------------------------|--------------------------------------------------------|---------------------------------|
| $\text{F} + \text{CH}_3\text{Cl} \rightarrow \text{HF} + \text{CH}_2\text{Cl}$                                             | $3.3 \times 10^{-11}$                                  | Wallington <i>et al.</i> (1993) |
| $\text{CH}_2\text{Cl} + \text{CH}_2\text{Cl} \rightarrow \text{CH}_2\text{ClCH}_2\text{Cl}$                                | $1 \times 10^{-11}$                                    | Roussel <i>et al.</i> (1991)    |
| $\text{CH}_2\text{Cl} + \text{O}_2 \rightarrow \text{CH}_2\text{ClO}_2$                                                    | $2.3 \times 10^{-13}$ at 5 Torr                        | Atkinson <i>et al.</i> (2005)   |
| $\text{CH}_2\text{Cl} + \text{CH}_2\text{ClO}_2 \rightarrow \text{CH}_2\text{ClO} + \text{CH}_2\text{ClO}$                 | $(0.6 - 1.2) \times 10^{-11}$                          | varied                          |
| $\text{CH}_2\text{ClO}_2 + \text{CH}_2\text{ClO}_2 \rightarrow \text{CH}_2\text{ClO} + \text{CH}_2\text{ClO} + \text{O}_2$ | $3.3 \times 10^{-12}$                                  | Atkinson <i>et al.</i> (2005)   |
| $\text{CH}_2\text{ClO}_2 + \text{CH}_2\text{ClO}_2 \rightarrow \text{HC(O)Cl} + \text{CH}_2\text{ClOH} + \text{O}_2$       | $0.3 \times 10^{-12}$                                  | Atkinson <i>et al.</i> (2005)   |
| $\text{CH}_2\text{ClO}_2 + \text{CH}_2\text{ClO} \rightarrow \text{products}$                                              | $(0.4 - 1.4) \times 10^{-11}$                          | varied                          |
| $\text{CH}_2\text{ClO} + \text{CH}_2\text{ClO} \rightarrow \text{products}$                                                | $1.3 \times 10^{-11}$                                  | estimated                       |
| $\text{CH}_2\text{ClO} \rightarrow \text{HCl} + \text{HCO}$                                                                | $325 - 650 \text{ s}^{-1}$ at 5 Torr                   | Wu and Carr (2001), varied      |
| $\text{HCO} + \text{O}_2 \rightarrow \text{HO}_2 + \text{CO}$                                                              | $5.2 \times 10^{-12}$                                  | Atkinson <i>et al.</i> (2005)   |
| $\text{CH}_2\text{ClO}_2 \rightarrow \text{products}$                                                                      | $0 - 3 \text{ s}^{-1}$                                 | varied                          |
| $\text{F} + \text{CH}_2\text{ClO}_2 \rightarrow \text{FO} + \text{CH}_2\text{ClO}$                                         | $(1 - 5) \times 10^{-10}$                              | estimated and varied            |
| $\text{FO} + \text{FO} \rightarrow \text{F} + \text{F} + \text{O}_2$                                                       | $1 \times 10^{-11}$                                    | Sander <i>et al.</i> (2003)     |
| $\text{CH}_2\text{ClO} + \text{O}_2 \rightarrow \text{HC(O)Cl} + \text{HO}_2$                                              | $8.0 \times 10^{-14}$                                  | Wu and Carr (2001)              |
| $\text{CH}_2\text{ClO}_2 + \text{HO}_2 \rightarrow \text{CH}_2\text{ClO}_2\text{H} + \text{O}_2$                           | $5.0 \times 10^{-12}$                                  | Atkinson <i>et al.</i> (2005)   |
| $\text{HO}_2 + \text{HO}_2 \rightarrow \text{H}_2\text{O}_2 + \text{O}_2$                                                  | $1.7 \times 10^{-12}$                                  | Atkinson <i>et al.</i> (2005)   |
| $\text{CH}_2\text{ClO}_2 + \text{NO} \rightarrow \text{NO}_2 + \text{CH}_2\text{ClO}$                                      | $1.9 \times 10^{-11}$                                  | Atkinson <i>et al.</i> (2005)   |
| $\text{CH}_2\text{ClO} + \text{NO} \rightarrow \text{products}$                                                            | $2.7 \times 10^{-12}$                                  | Atkinson <i>et al.</i> (2005)   |
| $\text{FO} + \text{NO} \rightarrow \text{F} + \text{NO}_2$                                                                 | $2.2 \times 10^{-11}$                                  | Atkinson <i>et al.</i> (2005)   |
| $\text{HO}_2 + \text{NO} \rightarrow \text{OH} + \text{NO}_2$                                                              | $8.5 \times 10^{-12}$                                  | Atkinson <i>et al.</i> (2005)   |
| $\text{OH} + \text{NO} \rightarrow \text{products}$                                                                        | $1 \times 10^{-13}$ at 5 Torr                          | Atkinson <i>et al.</i> (2005)   |
| $\text{HCO} + \text{NO} \rightarrow \text{HNO} + \text{CO}$                                                                | $1.3 \times 10^{-11}$                                  | Nesbitt <i>et al.</i> (1999)    |
| $\text{OH} + \text{CH}_3\text{Cl} \rightarrow \text{H}_2\text{O} + \text{CH}_2\text{Cl}$                                   | $4.2 \times 10^{-14}$                                  | Atkinson <i>et al.</i> (2005)   |
| $\text{CH}_2\text{Cl} + \text{NO} \rightarrow \text{products}$                                                             | $3 \times 10^{-13}$                                    | estimated                       |
| $\text{HO}_2 + \text{OH} \rightarrow \text{H}_2\text{O} + \text{O}_2$                                                      | $1 \times 10^{-10}$                                    | Atkinson <i>et al.</i> (2005)   |
| $\text{OH} \rightarrow \text{products}$                                                                                    | $0 - 10 \text{ s}^{-1}$                                | determined experimentally       |
| $\text{NO}_3 + \text{CH}_2\text{ClO}_2 \rightarrow \text{NO}_2 + \text{CH}_2\text{ClO} + \text{O}_2$                       | $(0.6 - 8.0) \times 10^{-12}$                          | varied                          |
| $\text{NO}_3 + \text{CH}_2\text{ClO} \rightarrow \text{NO}_2 + \text{CH}_2\text{ClO}_2$                                    | $(2 - 4) \times 10^{-12}$                              | varied                          |
| $\text{NO}_3 + \text{HO}_2 \rightarrow \text{NO}_2 + \text{OH} + \text{O}_2$                                               | $3.5 \times 10^{-12}$                                  | Atkinson <i>et al.</i> (2005)   |
| $\text{NO}_3 \rightarrow \text{products}$                                                                                  | $0 \text{ s}^{-1}$                                     | determined experimentally       |

## II.5 Chemistry of the *c*-C<sub>5</sub>H<sub>9</sub>O<sub>2</sub> system

| Reaction                                                                                                                                                                                                                                                                          | $k / \text{cm}^3 \text{ molecule}^{-1} \text{ s}^{-1}$ | Reference                     |
|-----------------------------------------------------------------------------------------------------------------------------------------------------------------------------------------------------------------------------------------------------------------------------------|--------------------------------------------------------|-------------------------------|
| $\text{F} + c\text{-C}_5\text{H}_{10} \rightarrow \text{HF} + c\text{-C}_5\text{H}_9$                                                                                                                                                                                             | $2.8 \times 10^{-10}$                                  | Bartels <i>et al.</i> (1985)  |
| $c\text{-C}_5\text{H}_9 + c\text{-C}_5\text{H}_9 \rightarrow \text{products}$                                                                                                                                                                                                     | $3 \times 10^{-11}$                                    | estimated                     |
| $c\text{-C}_5\text{H}_9 + \text{O}_2 \rightarrow c\text{-C}_5\text{H}_9\text{O}_2$                                                                                                                                                                                                | $1.7 \times 10^{-11}$                                  | Wu and Bayes (1986)           |
| $c\text{-C}_5\text{H}_9 + c\text{-C}_5\text{H}_9\text{O}_2 \rightarrow c\text{-C}_5\text{H}_9\text{O} + c\text{-C}_5\text{H}_9\text{O}$                                                                                                                                           | $(0.2 - 2.0) \times 10^{-12}$                          | estimated and varied          |
| $c\text{-C}_5\text{H}_9\text{O}_2 + c\text{-C}_5\text{H}_9\text{O}_2 \rightarrow$<br>$c\text{-C}_5\text{H}_9\text{O} + c\text{-C}_5\text{H}_9\text{O} + \text{O}_2$                                                                                                               | $4.4 \times 10^{-14}$                                  | Rowley <i>et al.</i> (1992a)  |
| $c\text{-C}_5\text{H}_9\text{O}_2 + c\text{-C}_5\text{H}_9\text{O}_2 \rightarrow \text{other products}$                                                                                                                                                                           | $2.3 \times 10^{-14}$                                  | Rowley <i>et al.</i> (1992a)  |
| $c\text{-C}_5\text{H}_9\text{O}_2 \rightarrow \text{products}$                                                                                                                                                                                                                    | $0 - 4 \text{ s}^{-1}$                                 | varied                        |
| $c\text{-C}_5\text{H}_9\text{O} + \text{O}_2 \rightarrow c\text{-C}_5\text{H}_8\text{O} + \text{HO}_2$                                                                                                                                                                            | $1.1 \times 10^{-14}$                                  | Aschmann <i>et al.</i> (1997) |
| $\text{F} + c\text{-C}_5\text{H}_9\text{O}_2 \rightarrow \text{FO} + c\text{-C}_5\text{H}_9\text{O}$                                                                                                                                                                              | $(1 - 5) \times 10^{-10}$                              | estimated and varied          |
| $\text{FO} + \text{FO} \rightarrow \text{F} + \text{F} + \text{O}_2$                                                                                                                                                                                                              | $1 \times 10^{-11}$                                    | Sander <i>et al.</i> (2003)   |
| $\text{FO} + \text{NO} \rightarrow \text{F} + \text{NO}_2$                                                                                                                                                                                                                        | $2.2 \times 10^{-11}$                                  | Atkinson <i>et al.</i> (2005) |
| $c\text{-C}_5\text{H}_9\text{O}_2 + \text{NO} \rightarrow c\text{-C}_5\text{H}_9\text{O} + \text{NO}_2$                                                                                                                                                                           | $1.1 \times 10^{-11}$                                  | Eberhard and Howard (1997)    |
| $c\text{-C}_5\text{H}_9\text{O} + \text{NO} \rightarrow \text{products}$                                                                                                                                                                                                          | $1 \times 10^{-11}$                                    | estimated                     |
| $c\text{-C}_5\text{H}_9\text{O} \rightarrow \text{CH}_2\text{CH}_2\text{CH}_2\text{CH}_2\text{C}(\text{O})\text{H}$                                                                                                                                                               | $80000 - 800000 \text{ s}^{-1}$                        | varied                        |
| $c\text{-C}_5\text{H}_9\text{O} \rightarrow \text{other products}$                                                                                                                                                                                                                | $10 \text{ s}^{-1}$                                    | estimated                     |
| $\text{CH}_2\text{CH}_2\text{CH}_2\text{CH}_2\text{C}(\text{O})\text{H} + \text{O}_2 \rightarrow$<br>$\text{O}_2\text{CH}_2\text{CH}_2\text{CH}_2\text{CH}_2\text{C}(\text{O})\text{H}$                                                                                           | $1 \times 10^{-11}$                                    | estimated                     |
| $\text{CH}_2\text{CH}_2\text{CH}_2\text{CH}_2\text{C}(\text{O})\text{H} + \text{NO} \rightarrow \text{products}$                                                                                                                                                                  | $1 \times 10^{-13}$                                    | estimated                     |
| $\text{O}_2\text{CH}_2\text{CH}_2\text{CH}_2\text{CH}_2\text{C}(\text{O})\text{H} +$<br>$\text{O}_2\text{CH}_2\text{CH}_2\text{CH}_2\text{CH}_2\text{C}(\text{O})\text{H} \rightarrow$<br>$2\text{OCH}_2\text{CH}_2\text{CH}_2\text{CH}_2\text{C}(\text{O})\text{H} + \text{O}_2$ | $(5 - 75) \times 10^{-13}$                             | estimated and varied          |
| $\text{O}_2\text{CH}_2\text{CH}_2\text{CH}_2\text{CH}_2\text{C}(\text{O})\text{H} +$<br>$\text{O}_2\text{CH}_2\text{CH}_2\text{CH}_2\text{CH}_2\text{C}(\text{O})\text{H} \rightarrow \text{other products}$                                                                      | $(5 - 75) \times 10^{-13}$                             | estimated and varied          |
| $c\text{-C}_5\text{H}_9\text{O}_2 + \text{O}_2\text{CH}_2\text{CH}_2\text{CH}_2\text{CH}_2\text{C}(\text{O})\text{H} \rightarrow$<br>$c\text{-C}_5\text{H}_9\text{O} + \text{OCH}_2\text{CH}_2\text{CH}_2\text{CH}_2\text{C}(\text{O})\text{H} + \text{O}_2$                      | $2.5 \times 10^{-13}$                                  | estimated                     |
| $c\text{-C}_5\text{H}_9\text{O}_2 + \text{O}_2\text{CH}_2\text{CH}_2\text{CH}_2\text{CH}_2\text{C}(\text{O})\text{H}$<br>$\rightarrow \text{other products}$                                                                                                                      | $2.5 \times 10^{-13}$                                  | estimated                     |
| $\text{O}_2\text{CH}_2\text{CH}_2\text{CH}_2\text{CH}_2\text{C}(\text{O})\text{H} + \text{NO}$<br>$\rightarrow \text{OCH}_2\text{CH}_2\text{CH}_2\text{CH}_2\text{C}(\text{O})\text{H} + \text{NO}_2$                                                                             | $1 \times 10^{-11}$                                    | estimated                     |
| $\text{OCH}_2\text{CH}_2\text{CH}_2\text{CH}_2\text{C}(\text{O})\text{H} + \text{O}_2$<br>$\rightarrow \text{HC}(\text{O})\text{CH}_2\text{CH}_2\text{CH}_2\text{C}(\text{O})\text{H} + \text{HO}_2$                                                                              | $1 \times 10^{-14}$                                    | estimated                     |
| $\text{OCH}_2\text{CH}_2\text{CH}_2\text{CH}_2\text{C}(\text{O})\text{H} + \text{NO} \rightarrow \text{products}$                                                                                                                                                                 | $(1 - 10) \times 10^{-11}$                             | estimated and varied          |
| $\text{HOCH}_2\text{CH}_2\text{CH}_2\text{CH}_2\text{C}(\text{O})\text{H} + \text{NO} \rightarrow \text{products}$                                                                                                                                                                | $(3 - 30) \times 10^{-12}$                             | estimated and varied          |

| Reaction                                                                                                                                                                                  | $k / \text{cm}^3 \text{ molecule}^{-1} \text{ s}^{-1}$ | Reference                     |
|-------------------------------------------------------------------------------------------------------------------------------------------------------------------------------------------|--------------------------------------------------------|-------------------------------|
| $\text{HOCH}_2\text{CH}_2\text{CH}_2\text{CHC}(\text{O})\text{H} + \text{O}_2 \rightarrow \text{HOCH}_2\text{CH}_2\text{CH}_2\text{CHO}_2\text{C}(\text{O})\text{H}$                      | $1 \times 10^{-11}$                                    | estimated                     |
| $\text{HOCH}_2\text{CH}_2\text{CH}_2\text{CHO}_2\text{C}(\text{O})\text{H} + \text{NO} \rightarrow \text{HOCH}_2\text{CH}_2\text{CH}_2\text{CHOC}(\text{O})\text{H} + \text{NO}_2$        | $1 \times 10^{-11}$                                    | estimated                     |
| $\text{HOCH}_2\text{CH}_2\text{CH}_2\text{CHOC}(\text{O})\text{H} + \text{NO} \rightarrow \text{products}$                                                                                | $(3 - 30) \times 10^{-12}$                             | estimated and varied          |
| $\text{HOCH}_2\text{CH}_2\text{CH}_2\text{CHOC}(\text{O})\text{H} + \text{O}_2 \rightarrow \text{HOCH}_2\text{CH}_2\text{CH}_2\text{C}(\text{O})\text{C}(\text{O})\text{H} + \text{HO}_2$ | $1 \times 10^{-14}$                                    | estimated                     |
| $\text{HOCH}_2\text{CH}_2\text{CH}_2\text{CHOC}(\text{O})\text{H} \rightarrow \text{HOCH}_2\text{CH}_2\text{CH}_2\text{C}(\text{O})\text{H} + \text{HCO}$                                 | $0 - 5000 \text{ s}^{-1}$                              | varied                        |
| $\text{HCO} + \text{O}_2 \rightarrow \text{HO}_2 + \text{CO}$                                                                                                                             | $5.2 \times 10^{-12}$                                  | Atkinson <i>et al.</i> (2005) |
| $\text{HCO} + \text{NO} \rightarrow \text{HNO} + \text{CO}$                                                                                                                               | $1.3 \times 10^{-11}$                                  | Nesbitt <i>et al.</i> (1999)  |
| $\text{HOCH}_2\text{CH}_2\text{CH}_2\text{CHOC}(\text{O})\text{H} \rightarrow \text{HOCHCH}_2\text{CH}_2\text{CHOHC}(\text{O})\text{H}$                                                   | $0 - 5000 \text{ s}^{-1}$                              | varied                        |
| $\text{HOCHCH}_2\text{CH}_2\text{CHOHC}(\text{O})\text{H} + \text{NO} \rightarrow \text{products}$                                                                                        | $3 \times 10^{-12}$                                    | estimated                     |
| $\text{HOCHCH}_2\text{CH}_2\text{CHOHC}(\text{O})\text{H} + \text{O}_2 \rightarrow \text{HC}(\text{O})\text{CH}_2\text{CH}_2\text{CHOHC}(\text{O})\text{H} + \text{HO}_2$                 | $2 \times 10^{-11}$                                    | estimated                     |
| $\text{HOCHCH}_2\text{CH}_2\text{CHOHC}(\text{O})\text{H} + \text{O}_2 \rightarrow \text{HOCHO}_2\text{CH}_2\text{CH}_2\text{CHOHC}(\text{O})\text{H}$                                    | $5 \times 10^{-12}$                                    | estimated                     |
| $\text{HOCHO}_2\text{CH}_2\text{CH}_2\text{CHOHC}(\text{O})\text{H} + \text{NO} \rightarrow \text{HOCHOCH}_2\text{CH}_2\text{CHOHC}(\text{O})\text{H} + \text{NO}_2$                      | $1 \times 10^{-11}$                                    | estimated                     |
| $\text{HOCHOCH}_2\text{CH}_2\text{CHOHC}(\text{O})\text{H} + \text{NO} \rightarrow \text{products}$                                                                                       | $3 \times 10^{-11}$                                    | estimated                     |
| $\text{HOCHOCH}_2\text{CH}_2\text{CHOHC}(\text{O})\text{H} + \text{O}_2 \rightarrow \text{HOC}(\text{O})\text{CH}_2\text{CH}_2\text{CHOHC}(\text{O})\text{H} + \text{HO}_2$               | $2 \times 10^{-11}$                                    | estimated                     |
| $\text{HOCHOCH}_2\text{CH}_2\text{CHOHC}(\text{O})\text{H} \rightarrow \text{CH}_2\text{CH}_2\text{CHOHC}(\text{O})\text{H} + \text{HCO}_2\text{H}$                                       | $0 - 5000 \text{ s}^{-1}$                              | varied                        |
| $\text{CH}_2\text{CH}_2\text{CHOHC}(\text{O})\text{H} + \text{NO} \rightarrow \text{products}$                                                                                            | $3 \times 10^{-12}$                                    | estimated                     |
| $\text{CH}_2\text{CH}_2\text{CHOHC}(\text{O})\text{H} + \text{O}_2 \rightarrow \text{O}_2\text{CH}_2\text{CH}_2\text{CHOHC}(\text{O})\text{H}$                                            | $1 \times 10^{-11}$                                    | estimated                     |
| $\text{OCH}_2\text{CH}_2\text{CHOHC}(\text{O})\text{H} + \text{NO} \rightarrow \text{products}$                                                                                           | $3 \times 10^{-11}$                                    | estimated                     |
| $\text{OCH}_2\text{CH}_2\text{CHOHC}(\text{O})\text{H} + \text{O}_2 \rightarrow \text{HC}(\text{O})\text{CH}_2\text{CHOHC}(\text{O})\text{H} + \text{HO}_2$                               | $1 \times 10^{-14}$                                    | estimated                     |
| $\text{OCH}_2\text{CH}_2\text{CHOHC}(\text{O})\text{H} \rightarrow \text{HOCH}_2\text{CH}_2\text{CHOHC}(\text{O})\text{H}$                                                                | $0 - 5000 \text{ s}^{-1}$                              | varied                        |
| $\text{HOCH}_2\text{CH}_2\text{CHOHC}(\text{O})\text{H} + \text{NO} \rightarrow \text{products}$                                                                                          | $3 \times 10^{-12}$                                    | estimated                     |
| $\text{HOCH}_2\text{CH}_2\text{CHOHC}(\text{O})\text{H} + \text{O}_2 \rightarrow \text{HOCH}_2\text{CH}_2\text{CHOHC}(\text{O})\text{O}_2$                                                | $5 \times 10^{-12}$                                    | estimated                     |

| Reaction                                                                                                                                                                    | $k / \text{cm}^3 \text{ molecule}^{-1} \text{ s}^{-1}$ | Reference                     |
|-----------------------------------------------------------------------------------------------------------------------------------------------------------------------------|--------------------------------------------------------|-------------------------------|
| $\text{HOCH}_2\text{CH}_2\text{CHOHC(O)O}_2 + \text{NO} \rightarrow$<br>$\text{HOCH}_2\text{CH}_2\text{CHOHC(O)O} + \text{NO}_2$                                            | $1 \times 10^{-11}$                                    | estimated                     |
| $\text{HOCH}_2\text{CH}_2\text{CHOHC(O)O} \rightarrow$<br>$\text{HOCH}_2\text{CH}_2\text{CHOH} + \text{CO}_2$                                                               | $0 - 5000 \text{ s}^{-1}$                              | varied                        |
| $\text{HOCH}_2\text{CH}_2\text{CHOH} + \text{NO} \rightarrow \text{products}$                                                                                               | $3 \times 10^{-11}$                                    | estimated                     |
| $\text{HOCH}_2\text{CH}_2\text{CHOH} + \text{O}_2 \rightarrow$<br>$\text{HOCH}_2\text{CH}_2\text{C(O)H} + \text{HO}_2$                                                      | $1 \times 10^{-11}$                                    | estimated                     |
| $c\text{-C}_5\text{H}_9\text{O}_2 + \text{HO}_2 \rightarrow c\text{-C}_5\text{H}_9\text{O}_2\text{H} + \text{O}_2$                                                          | $1.8 \times 10^{-11}$                                  | Rowley <i>et al.</i> (1992b)  |
| $\text{HO}_2 + \text{HO}_2 \rightarrow \text{H}_2\text{O}_2 + \text{O}_2$                                                                                                   | $1.7 \times 10^{-12}$                                  | Atkinson <i>et al.</i> (2005) |
| $\text{HO}_2 + \text{NO} \rightarrow \text{OH} + \text{NO}_2$                                                                                                               | $8.5 \times 10^{-12}$                                  | Atkinson <i>et al.</i> (2005) |
| $\text{OH} + \text{NO} \rightarrow \text{products}$                                                                                                                         | $1 \times 10^{-13}$ at 5 Torr                          | Atkinson <i>et al.</i> (2005) |
| $\text{OH} + c\text{-C}_5\text{H}_{10} \rightarrow \text{H}_2\text{O} + c\text{-C}_5\text{H}_9$                                                                             | $5 \times 10^{-12}$                                    | DeMore and Bayes (1999)       |
| $c\text{-C}_5\text{H}_9 + \text{NO} \rightarrow \text{products}$                                                                                                            | $1 \times 10^{-12}$                                    | estimated                     |
| $\text{HO}_2 + \text{OH} \rightarrow \text{H}_2\text{O} + \text{O}_2$                                                                                                       | $1 \times 10^{-10}$                                    | Atkinson <i>et al.</i> (2005) |
| $\text{OH} \rightarrow \text{products}$                                                                                                                                     | $0 - 10 \text{ s}^{-1}$                                | determined experimentally     |
| $\text{NO}_3 + c\text{-C}_5\text{H}_9\text{O}_2 \rightarrow \text{NO}_2 + c\text{-C}_5\text{H}_9\text{O} + \text{O}_2$                                                      | $(0.1 - 3.0) \times 10^{-12}$                          | varied                        |
| $\text{NO}_3 + \text{O}_2\text{CH}_2\text{CH}_2\text{CH}_2\text{CH}_2\text{C(O)H} \rightarrow$<br>$\text{NO}_2 + \text{OCH}_2\text{CH}_2\text{CH}_2\text{CH}_2\text{C(O)H}$ | $(0.1 - 2.5) \times 10^{-12}$                          | varied                        |
| $\text{NO}_3 + \text{HO}_2 \rightarrow \text{NO}_2 + \text{OH} + \text{O}_2$                                                                                                | $3.5 \times 10^{-12}$                                  | Atkinson <i>et al.</i> (2005) |
| $\text{NO}_3 \rightarrow \text{products}$                                                                                                                                   | $0 \text{ s}^{-1}$                                     | determined experimentally     |

---

## II.6 Chemistry of the *c*-C<sub>6</sub>H<sub>11</sub>O<sub>2</sub> system

| Reaction                                                                                                                                                                                                                                                                                      | $k / \text{cm}^3 \text{ molecule}^{-1} \text{ s}^{-1}$ | Reference                              |
|-----------------------------------------------------------------------------------------------------------------------------------------------------------------------------------------------------------------------------------------------------------------------------------------------|--------------------------------------------------------|----------------------------------------|
| $\text{F} + c\text{-C}_6\text{H}_{12} \rightarrow \text{HF} + c\text{-C}_6\text{H}_{11}$                                                                                                                                                                                                      | $1 \times 10^{-10}$                                    | Heinemann-Fiedler <i>et al.</i> (1990) |
| $c\text{-C}_6\text{H}_{11} + c\text{-C}_6\text{H}_{11} \rightarrow \text{products}$                                                                                                                                                                                                           | $3 \times 10^{-11}$                                    | Platz <i>et al.</i> (1999)             |
| $c\text{-C}_6\text{H}_{11} + \text{O}_2 \rightarrow c\text{-C}_6\text{H}_{11}\text{O}_2$                                                                                                                                                                                                      | $1.3 \times 10^{-11}$                                  | Platz <i>et al.</i> (1999)             |
| $c\text{-C}_6\text{H}_{11} + c\text{-C}_6\text{H}_{11}\text{O}_2 \rightarrow c\text{-C}_6\text{H}_{11}\text{O} + c\text{-C}_6\text{H}_{11}\text{O}$                                                                                                                                           | $(0.2 - 20) \times 10^{-12}$                           | estimated and varied                   |
| $c\text{-C}_6\text{H}_{11}\text{O}_2 + c\text{-C}_6\text{H}_{11}\text{O}_2 \rightarrow$<br>$c\text{-C}_6\text{H}_{11}\text{O} + c\text{-C}_6\text{H}_{11}\text{O} + \text{O}_2$                                                                                                               | $2.0 \times 10^{-14}$                                  | Rowley <i>et al.</i> (1992a)           |
| $c\text{-C}_6\text{H}_{11}\text{O}_2 + c\text{-C}_6\text{H}_{11}\text{O}_2 \rightarrow \text{other products}$                                                                                                                                                                                 | $2.2 \times 10^{-14}$                                  | Rowley <i>et al.</i> (1992a)           |
| $c\text{-C}_6\text{H}_{11}\text{O}_2 \rightarrow \text{products}$                                                                                                                                                                                                                             | $0 - 2 \text{ s}^{-1}$                                 | varied                                 |
| $c\text{-C}_6\text{H}_{11}\text{O} + \text{O}_2 \rightarrow c\text{-C}_6\text{H}_{10}\text{O} + \text{HO}_2$                                                                                                                                                                                  | $1 \times 10^{-14}$                                    | estimated                              |
| $\text{F} + c\text{-C}_6\text{H}_{11}\text{O}_2 \rightarrow \text{FO} + c\text{-C}_6\text{H}_{11}\text{O}$                                                                                                                                                                                    | $(1 - 5) \times 10^{-10}$                              | estimated and varied                   |
| $\text{FO} + \text{FO} \rightarrow \text{F} + \text{F} + \text{O}_2$                                                                                                                                                                                                                          | $1 \times 10^{-11}$                                    | Sander <i>et al.</i> (2003)            |
| $\text{FO} + \text{NO} \rightarrow \text{F} + \text{NO}_2$                                                                                                                                                                                                                                    | $2.2 \times 10^{-11}$                                  | Atkinson <i>et al.</i> (2005)          |
| $c\text{-C}_6\text{H}_{11}\text{O}_2 + \text{NO} \rightarrow c\text{-C}_6\text{H}_{11}\text{O} + \text{NO}_2$                                                                                                                                                                                 | $6.7 \times 10^{-12}$                                  | Platz <i>et al.</i> (1999)             |
| $c\text{-C}_6\text{H}_{11}\text{O} + \text{NO} \rightarrow \text{products}$                                                                                                                                                                                                                   | $1 \times 10^{-11}$                                    | estimated                              |
| $c\text{-C}_6\text{H}_{11}\text{O} \rightarrow \text{CH}_2\text{CH}_2\text{CH}_2\text{CH}_2\text{CH}_2\text{C}(\text{O})\text{H}$                                                                                                                                                             | $300 - 1000 \text{ s}^{-1}$                            | varied                                 |
| $c\text{-C}_6\text{H}_{11}\text{O} \rightarrow \text{other products}$                                                                                                                                                                                                                         | $10 \text{ s}^{-1}$                                    | estimated                              |
| $\text{CH}_2\text{CH}_2\text{CH}_2\text{CH}_2\text{CH}_2\text{C}(\text{O})\text{H} + \text{O}_2 \rightarrow$<br>$\text{O}_2\text{CH}_2\text{CH}_2\text{CH}_2\text{CH}_2\text{CH}_2\text{C}(\text{O})\text{H}$                                                                                 | $1 \times 10^{-11}$                                    | estimated                              |
| $\text{CH}_2\text{CH}_2\text{CH}_2\text{CH}_2\text{CH}_2\text{C}(\text{O})\text{H} + \text{NO} \rightarrow$<br>products                                                                                                                                                                       | $1 \times 10^{-13}$                                    | estimated                              |
| $2\text{O}_2\text{CH}_2\text{CH}_2\text{CH}_2\text{CH}_2\text{CH}_2\text{C}(\text{O})\text{H} \rightarrow$<br>$2\text{OCH}_2\text{CH}_2\text{CH}_2\text{CH}_2\text{CH}_2\text{C}(\text{O})\text{H} + \text{O}_2$                                                                              | $5 \times 10^{-13}$                                    | estimated                              |
| $2\text{O}_2\text{CH}_2\text{CH}_2\text{CH}_2\text{CH}_2\text{CH}_2\text{C}(\text{O})\text{H} \rightarrow$<br>other products                                                                                                                                                                  | $5 \times 10^{-13}$                                    | estimated                              |
| $c\text{-C}_6\text{H}_{11}\text{O}_2 + \text{O}_2\text{CH}_2\text{CH}_2\text{CH}_2\text{CH}_2\text{CH}_2\text{C}(\text{O})\text{H}$<br>$\rightarrow c\text{-C}_6\text{H}_{11}\text{O} + \text{OCH}_2\text{CH}_2\text{CH}_2\text{CH}_2\text{CH}_2\text{C}(\text{O})\text{H}$<br>$+ \text{O}_2$ | $2.5 \times 10^{-13}$                                  | estimated                              |
| $c\text{-C}_6\text{H}_{11}\text{O}_2 + \text{O}_2\text{CH}_2\text{CH}_2\text{CH}_2\text{CH}_2\text{CH}_2\text{C}(\text{O})\text{H}$<br>$\rightarrow \text{other products}$                                                                                                                    | $2.5 \times 10^{-13}$                                  | estimated                              |
| $\text{O}_2\text{CH}_2\text{CH}_2\text{CH}_2\text{CH}_2\text{CH}_2\text{C}(\text{O})\text{H} + \text{NO} \rightarrow$<br>$\text{OCH}_2\text{CH}_2\text{CH}_2\text{CH}_2\text{CH}_2\text{C}(\text{O})\text{H} + \text{NO}_2$                                                                   | $1 \times 10^{-11}$                                    | estimated                              |
| $\text{OCH}_2\text{CH}_2\text{CH}_2\text{CH}_2\text{CH}_2\text{C}(\text{O})\text{H} + \text{O}_2 \rightarrow$<br>$\text{HC}(\text{O})\text{CH}_2\text{CH}_2\text{CH}_2\text{CH}_2\text{C}(\text{O})\text{H} + \text{HO}_2$                                                                    | $1 \times 10^{-14}$                                    | estimated                              |
| $\text{OCH}_2\text{CH}_2\text{CH}_2\text{CH}_2\text{CH}_2\text{C}(\text{O})\text{H} + \text{NO} \rightarrow$<br>products                                                                                                                                                                      | $1 \times 10^{-11}$                                    | estimated and varied                   |

| Reaction                                                                                                                                                                                                             | $k / \text{cm}^3 \text{ molecule}^{-1} \text{ s}^{-1}$ | Reference                     |
|----------------------------------------------------------------------------------------------------------------------------------------------------------------------------------------------------------------------|--------------------------------------------------------|-------------------------------|
| $\text{HOCH}_2\text{CH}_2\text{CH}_2\text{CHCH}_2\text{C}(\text{O})\text{H} + \text{NO} \rightarrow$<br>products                                                                                                     | $3 \times 10^{-12}$                                    | estimated and varied          |
| $\text{HOCH}_2\text{CH}_2\text{CH}_2\text{CHCH}_2\text{C}(\text{O})\text{H} + \text{O}_2 \rightarrow$<br>$\text{HOCH}_2\text{CH}_2\text{CH}_2\text{CHO}_2\text{CH}_2\text{C}(\text{O})\text{H}$                      | $1 \times 10^{-11}$                                    | estimated                     |
| $\text{HOCH}_2\text{CH}_2\text{CH}_2\text{CHO}_2\text{CH}_2\text{C}(\text{O})\text{H} + \text{NO} \rightarrow$<br>$\text{HOCH}_2\text{CH}_2\text{CH}_2\text{CHOCH}_2\text{C}(\text{O})\text{H} + \text{NO}_2$        | $1 \times 10^{-11}$                                    | estimated                     |
| $\text{HOCH}_2\text{CH}_2\text{CH}_2\text{CHOCH}_2\text{C}(\text{O})\text{H} + \text{NO} \rightarrow$<br>products                                                                                                    | $3 \times 10^{-12}$                                    | estimated and varied          |
| $\text{HOCH}_2\text{CH}_2\text{CH}_2\text{CHOCH}_2\text{C}(\text{O})\text{H} + \text{O}_2 \rightarrow$<br>$\text{HOCH}_2\text{CH}_2\text{CH}_2\text{C}(\text{O})\text{CH}_2\text{C}(\text{O})\text{H} + \text{HO}_2$ | $1 \times 10^{-14}$                                    | estimated                     |
| $\text{HOCH}_2\text{CH}_2\text{CH}_2\text{CHOCH}_2\text{C}(\text{O})\text{H} \rightarrow$<br>$\text{HOCHCH}_2\text{CH}_2\text{CHOHCH}_2\text{C}(\text{O})\text{H}$                                                   | $0 - 5000 \text{ s}^{-1}$                              | varied                        |
| $\text{HCO} + \text{O}_2 \rightarrow \text{HO}_2 + \text{CO}$                                                                                                                                                        | $5.2 \times 10^{-12}$                                  | Atkinson <i>et al.</i> (2005) |
| $\text{HCO} + \text{NO} \rightarrow \text{HNO} + \text{CO}$                                                                                                                                                          | $1.3 \times 10^{-11}$                                  | Nesbitt <i>et al.</i> (1999)  |
| $\text{HOCH}_2\text{CH}_2\text{CH}_2\text{CHOC}(\text{O})\text{H} \rightarrow$<br>$\text{HOCHCH}_2\text{CH}_2\text{CHOHC}(\text{O})\text{H}$                                                                         | $0 - 5000 \text{ s}^{-1}$                              | varied                        |
| $\text{HOCHCH}_2\text{CH}_2\text{CHOHCH}_2\text{C}(\text{O})\text{H} + \text{NO} \rightarrow$<br>products                                                                                                            | $3 \times 10^{-12}$                                    | estimated                     |
| $\text{HOCHCH}_2\text{CH}_2\text{CHOHCH}_2\text{C}(\text{O})\text{H} + \text{O}_2 \rightarrow$<br>$\text{HC}(\text{O})\text{CH}_2\text{CH}_2\text{CHOHCH}_2\text{C}(\text{O})\text{H} + \text{HO}_2$                 | $2 \times 10^{-11}$                                    | estimated                     |
| $\text{HOCHCH}_2\text{CH}_2\text{CHOHCH}_2\text{C}(\text{O})\text{H} + \text{O}_2 \rightarrow$<br>$\text{HOCHO}_2\text{CH}_2\text{CH}_2\text{CHOHCH}_2\text{C}(\text{O})\text{H}$                                    | $5 \times 10^{-12}$                                    | estimated                     |
| $\text{HOCHO}_2\text{CH}_2\text{CH}_2\text{CHOHCH}_2\text{C}(\text{O})\text{H} + \text{NO} \rightarrow$<br>$\text{HOCHOCH}_2\text{CH}_2\text{CHOHCH}_2\text{C}(\text{O})\text{H} + \text{NO}_2$                      | $1 \times 10^{-11}$                                    | estimated                     |
| $\text{HOCHOCH}_2\text{CH}_2\text{CHOHCH}_2\text{C}(\text{O})\text{H} + \text{NO} \rightarrow$<br>products                                                                                                           | $3 \times 10^{-11}$                                    | estimated                     |
| $\text{HOCHOCH}_2\text{CH}_2\text{CHOHCH}_2\text{C}(\text{O})\text{H} + \text{O}_2 \rightarrow$<br>$\text{HC}(\text{O})\text{CH}_2\text{CH}_2\text{CHOHCH}_2\text{C}(\text{O})\text{H} + \text{HO}_2$                | $2 \times 10^{-11}$                                    | estimated                     |
| $\text{HOCHOCH}_2\text{CH}_2\text{CHOHCH}_2\text{C}(\text{O})\text{H} \rightarrow$<br>$\text{CH}_2\text{CH}_2\text{CHOHCH}_2\text{C}(\text{O})\text{H} + \text{HCO}_2\text{H}$                                       | $0 - 5000 \text{ s}^{-1}$                              | varied                        |
| $\text{CH}_2\text{CH}_2\text{CHOHCH}_2\text{C}(\text{O})\text{H} + \text{NO} \rightarrow$ products                                                                                                                   | $3 \times 10^{-12}$                                    | estimated                     |
| $\text{CH}_2\text{CH}_2\text{CHOHCH}_2\text{C}(\text{O})\text{H} + \text{O}_2 \rightarrow$<br>$\text{O}_2\text{CH}_2\text{CH}_2\text{CHOHCH}_2\text{C}(\text{O})\text{H}$                                            | $1 \times 10^{-11}$                                    | estimated                     |
| $\text{O}_2\text{CH}_2\text{CH}_2\text{CHOHCH}_2\text{C}(\text{O})\text{H} + \text{NO} \rightarrow$<br>$\text{OCH}_2\text{CH}_2\text{CHOHCH}_2\text{C}(\text{O})\text{H} + \text{NO}_2$                              | $1 \times 10^{-11}$                                    | estimated                     |
| $\text{OCH}_2\text{CH}_2\text{CHOHCH}_2\text{C}(\text{O})\text{H} + \text{NO} \rightarrow$<br>products                                                                                                               | $3 \times 10^{-11}$                                    | estimated                     |
| $\text{OCH}_2\text{CH}_2\text{CHOHCH}_2\text{C}(\text{O})\text{H} + \text{O}_2 \rightarrow$<br>$\text{HC}(\text{O})\text{CH}_2\text{CHOHCH}_2\text{C}(\text{O})\text{H} + \text{HO}_2$                               | $1 \times 10^{-14}$                                    | estimated                     |

| Reaction                                                                                                                                                                                                                 | $k / \text{cm}^3 \text{ molecule}^{-1} \text{ s}^{-1}$ | Reference                     |
|--------------------------------------------------------------------------------------------------------------------------------------------------------------------------------------------------------------------------|--------------------------------------------------------|-------------------------------|
| $\text{HOCH}_2\text{CH}_2\text{CHOHCHC}(\text{O})\text{H} + \text{O}_2 \rightarrow \text{HOCH}_2\text{CH}_2\text{CHOHCHO}_2\text{C}(\text{O})\text{H}$                                                                   | $5 \times 10^{-12}$                                    | estimated                     |
| $\text{HOCH}_2\text{CH}_2\text{CHOHCHO}_2\text{C}(\text{O})\text{H} + \text{NO} \rightarrow \text{HOCH}_2\text{CH}_2\text{CHOHCHOC}(\text{O})\text{H} + \text{NO}_2$                                                     | $1 \times 10^{-11}$                                    | estimated                     |
| $\text{HOCH}_2\text{CH}_2\text{CHOHCHOC}(\text{O})\text{H} \rightarrow \text{HOCH}_2\text{CH}_2\text{CHOHC}(\text{O})\text{H} + \text{HCO}$                                                                              | $0 - 5000 \text{ s}^{-1}$                              | varied                        |
| $\text{HOCH}_2\text{CH}_2\text{CHOHCHOC}(\text{O})\text{H} + \text{NO} \rightarrow \text{products}$                                                                                                                      | $3 \times 10^{-11}$                                    | estimated                     |
| $\text{HOCH}_2\text{CH}_2\text{CHOHCHOC}(\text{O})\text{H} + \text{O}_2 \rightarrow \text{HOCH}_2\text{CH}_2\text{CHOHC}(\text{O})\text{C}(\text{O})\text{H} + \text{HO}_2$                                              | $1 \times 10^{-11}$                                    | estimated                     |
| $c\text{-C}_6\text{H}_{11}\text{O}_2 + \text{HO}_2 \rightarrow c\text{-C}_6\text{H}_{11}\text{O}_2\text{H} + \text{O}_2$                                                                                                 | $1.7 \times 10^{-11}$                                  | Rowley <i>et al.</i> (1992b)  |
| $\text{HO}_2 + \text{HO}_2 \rightarrow \text{H}_2\text{O}_2 + \text{O}_2$                                                                                                                                                | $1.7 \times 10^{-12}$                                  | Atkinson <i>et al.</i> (2005) |
| $\text{HO}_2 + \text{NO} \rightarrow \text{OH} + \text{NO}_2$                                                                                                                                                            | $8.5 \times 10^{-12}$                                  | Atkinson <i>et al.</i> (2005) |
| $\text{OH} + \text{NO} \rightarrow \text{products}$                                                                                                                                                                      | $1 \times 10^{-13}$ at 5 Torr                          | Atkinson <i>et al.</i> (2005) |
| $\text{OH} + c\text{-C}_6\text{H}_{12} \rightarrow \text{H}_2\text{O} + c\text{-C}_6\text{H}_{11}$                                                                                                                       | $7 \times 10^{-12}$                                    | Atkinson (2003)               |
| $c\text{-C}_6\text{H}_{11} + \text{NO} \rightarrow \text{products}$                                                                                                                                                      | $1 \times 10^{-12}$                                    | estimated                     |
| $\text{HO}_2 + \text{OH} \rightarrow \text{H}_2\text{O} + \text{O}_2$                                                                                                                                                    | $1 \times 10^{-10}$                                    | Atkinson <i>et al.</i> (2005) |
| $\text{OH} \rightarrow \text{products}$                                                                                                                                                                                  | $0 - 10 \text{ s}^{-1}$                                | determined experimentally     |
| $\text{NO}_3 + c\text{-C}_6\text{H}_{11}\text{O}_2 \rightarrow \text{NO}_2 + c\text{-C}_6\text{H}_{11}\text{O} + \text{O}_2$                                                                                             | $(0.1 - 4.0) \times 10^{-12}$                          | varied                        |
| $\text{NO}_3 + \text{O}_2\text{CH}_2\text{CH}_2\text{CH}_2\text{CH}_2\text{CH}_2\text{C}(\text{O})\text{H} \rightarrow \text{NO}_2 + \text{OCH}_2\text{CH}_2\text{CH}_2\text{CH}_2\text{CH}_2\text{C}(\text{O})\text{H}$ | $(0.1 - 2.5) \times 10^{-12}$                          | varied                        |
| $\text{NO}_3 + \text{HO}_2 \rightarrow \text{NO}_2 + \text{OH} + \text{O}_2$                                                                                                                                             | $3.5 \times 10^{-12}$                                  | Atkinson <i>et al.</i> (2005) |
| $\text{NO}_3 \rightarrow \text{products}$                                                                                                                                                                                | $0 \text{ s}^{-1}$                                     | determined experimentally     |

---

## II.7 Chemistry of the CF<sub>3</sub>O<sub>2</sub> system

| Reaction                                                                                                                | $k / \text{cm}^3 \text{ molecule}^{-1} \text{ s}^{-1}$ | Reference                      |
|-------------------------------------------------------------------------------------------------------------------------|--------------------------------------------------------|--------------------------------|
| $\text{F} + \text{CF}_3\text{H} \rightarrow \text{HF} + \text{CF}_3$                                                    | $1.5 \times 10^{-13}$                                  | Møgelberg <i>et al.</i> (1996) |
| $\text{CF}_3 + \text{CF}_3 \rightarrow \text{products}$                                                                 | $3.9 \times 10^{-12}$                                  | Vakhtin (1996)                 |
| $\text{CF}_3 + \text{O}_2 \rightarrow \text{CF}_3\text{O}_2$                                                            | $1.4 \times 10^{-12}$ at 6 Torr                        | Atkinson <i>et al.</i> (2005)  |
| $\text{CF}_3 + \text{CF}_3\text{O}_2 \rightarrow \text{CF}_3\text{O} + \text{CF}_3\text{O}$                             | $5 \times 10^{-12}$                                    | estimated                      |
| $\text{CF}_3\text{O}_2 + \text{CF}_3\text{O}_2 \rightarrow$<br>$\text{CF}_3\text{O} + \text{CF}_3\text{O} + \text{O}_2$ | $1.7 \times 10^{-12}$                                  | Atkinson <i>et al.</i> (2005)  |
| $\text{CF}_3\text{O}_2 + \text{CF}_3\text{O} \rightarrow \text{CF}_3\text{OOOCF}_3$                                     | $1 \times 10^{-10}$                                    | Nielsen and Sehested (1993)    |
| $\text{CF}_3\text{O} + \text{CF}_3\text{O} \rightarrow \text{products}$                                                 | $(1 - 20) \times 10^{-12}$                             | varied                         |
| $\text{CF}_3\text{O} \rightarrow \text{products}$                                                                       | $0-50 \text{ s}^{-1}$                                  | varied                         |
| $\text{CF}_3\text{O}_2 \rightarrow \text{products}$                                                                     | $0 - 2 \text{ s}^{-1}$                                 | varied                         |
| $\text{F} + \text{CF}_3\text{O}_2 \rightarrow \text{FO} + \text{CF}_3\text{O}$                                          | $(1 - 5) \times 10^{-10}$                              | varied                         |
| $\text{FO} + \text{FO} \rightarrow \text{F} + \text{F} + \text{O}_2$                                                    | $1 \times 10^{-11}$                                    | Sander <i>et al.</i> (2003)    |
| $\text{NO} + \text{CF}_3\text{O}_2 \rightarrow \text{NO}_2 + \text{CF}_3\text{O}$                                       | $1.6 \times 10^{-11}$                                  | Atkinson <i>et al.</i> (2005)  |
| $\text{CF}_3\text{O} + \text{NO} \rightarrow \text{products}$                                                           | $5.4 \times 10^{-11}$                                  | Atkinson <i>et al.</i> (2005)  |
| $\text{FO} + \text{NO} \rightarrow \text{F} + \text{NO}_2$                                                              | $2.2 \times 10^{-11}$                                  | Atkinson <i>et al.</i> (2005)  |
| $\text{NO}_3 + \text{CF}_3\text{O}_2 \rightarrow$<br>$\text{NO}_2 + \text{CF}_3\text{O} + \text{O}_2$                   | $(1.0 - 12.0) \times 10^{-13}$                         | varied                         |
| $\text{NO}_3 + \text{CF}_3\text{O} \rightarrow \text{NO}_2 + \text{CF}_3\text{O}_2$                                     | $(0.1 - 3.5) \times 10^{-12}$                          | varied                         |
| $\text{NO}_3 \rightarrow \text{products}$                                                                               | $0 \text{ s}^{-1}$                                     | determined experimentally      |

## II.8 Chemistry of the CF<sub>3</sub>CFO<sub>2</sub>CF<sub>3</sub> system

| Reaction                                                                                                                              | $k / \text{cm}^3 \text{ molecule}^{-1} \text{ s}^{-1}$ | Reference                                    |
|---------------------------------------------------------------------------------------------------------------------------------------|--------------------------------------------------------|----------------------------------------------|
| $\text{F} + \text{CF}_3\text{CFHCF}_3 \rightarrow \text{HF} + \text{CF}_3\text{CFCF}_3$                                               | $1.5 \times 10^{-13}$                                  | Møgelberg <i>et al.</i> (1996)               |
| $\text{CF}_3\text{CFCF}_3 + \text{CF}_3\text{CFCF}_3 \rightarrow \text{products}$                                                     | $1 \times 10^{-12}$                                    | estimated, Skorobogatov <i>et al.</i> (1986) |
| $\text{CF}_3\text{CFCF}_3 + \text{O}_2 \rightarrow \text{CF}_3\text{CFO}_2\text{CF}_3$                                                | $1.4 \times 10^{-12}$ at 6 Torr                        | estimated                                    |
| $\text{CF}_3\text{CFCF}_3 + \text{CF}_3\text{CFO}_2\text{CF}_3 \rightarrow 2\text{CF}_3\text{CFOCF}_3$                                | $4 \times 10^{-12}$                                    | estimated                                    |
| $\text{CF}_3\text{CFO}_2\text{CF}_3 + \text{CF}_3\text{CFO}_2\text{CF}_3 \rightarrow 2\text{CF}_3\text{CFOCF}_3$                      | $1.8 \times 10^{-12}$                                  | Møgelberg <i>et al.</i> (1996)               |
| $\text{CF}_3\text{CFO}_2\text{CF}_3 \rightarrow \text{products}$                                                                      | $0 - 5 \text{ s}^{-1}$                                 | varied                                       |
| $\text{CF}_3\text{CFOCF}_3 \rightarrow \text{CF}_3 + \text{CF}_3\text{CFO}$                                                           | $10^3 - 10^6 \text{ s}^{-1}$                           | Møgelberg <i>et al.</i> (1996), varied       |
| $\text{CF}_3 + \text{O}_2 \rightarrow \text{CF}_3\text{O}_2$                                                                          | $(1 - 1.4) \times 10^{-12}$ at 6 Torr                  | Atkinson <i>et al.</i> (2005)                |
| $\text{CF}_3\text{CFO}_2\text{CF}_3 + \text{CF}_3\text{O}_2 \rightarrow \text{CF}_3\text{CFOCF}_3 + \text{CF}_3\text{O} + \text{O}_2$ | $1.2 \times 10^{-12}$                                  | estimated                                    |
| $\text{CF}_3\text{O}_2 + \text{CF}_3\text{O}_2 \rightarrow \text{CF}_3\text{O} + \text{CF}_3\text{O} + \text{O}_2$                    | $1.7 \times 10^{-12}$                                  | Atkinson <i>et al.</i> (2005)                |
| $\text{CF}_3\text{O} + \text{CF}_3\text{O} \rightarrow \text{products}$                                                               | $(1 - 20) \times 10^{-12}$                             | varied                                       |
| $\text{CF}_3\text{CFO}_2\text{CF}_3 + \text{CF}_3\text{O} \rightarrow (\text{CF}_3)_2\text{CFOOOCF}_3$                                | $1 \times 10^{-12}$                                    | estimated                                    |
| $\text{CF}_3\text{O}_2 + \text{CF}_3\text{O} \rightarrow \text{CF}_3\text{OOOCF}_3$                                                   | $1 \times 10^{-10}$                                    | Nielsen and Sehested (1993)                  |
| $\text{CF}_3\text{O} \rightarrow \text{products}$                                                                                     | $0 - 50 \text{ s}^{-1}$                                | varied                                       |
| $\text{CF}_3\text{O}_2 \rightarrow \text{products}$                                                                                   | $0 - 5 \text{ s}^{-1}$                                 | varied                                       |
| $\text{CF}_3 + \text{CF}_3\text{O}_2 \rightarrow \text{CF}_3\text{O} + \text{CF}_3\text{O}$                                           | $5 \times 10^{-12}$                                    | estimated                                    |
| $\text{CF}_3 + \text{CF}_3 \rightarrow \text{products}$                                                                               | $3.9 \times 10^{-12}$                                  | Vakhtin (1996)                               |
| $\text{F} + \text{CF}_3\text{CFO}_2\text{CF}_3 \rightarrow \text{FO} + \text{CF}_3\text{CFOCF}_3$                                     | $(1 - 5) \times 10^{-10}$                              | varied                                       |
| $\text{FO} + \text{FO} \rightarrow \text{F} + \text{F} + \text{O}_2$                                                                  | $1 \times 10^{-11}$                                    | Sander <i>et al.</i> (2003)                  |
| $\text{NO} + \text{CF}_3\text{CFO}_2\text{CF}_3 \rightarrow \text{NO}_2 + \text{CF}_3\text{CFOCF}_3$                                  | $2.1 \times 10^{-11}$                                  | Møgelberg <i>et al.</i> (1996)               |
| $\text{NO} + \text{CF}_3\text{O}_2 \rightarrow \text{NO}_2 + \text{CF}_3\text{O}$                                                     | $1.6 \times 10^{-11}$                                  | Atkinson <i>et al.</i> (2005)                |
| $\text{CF}_3\text{CFOCF}_3 + \text{NO} \rightarrow \text{products}$                                                                   | $(2 - 5) \times 10^{-11}$                              | estimate                                     |
| $\text{CF}_3\text{O} + \text{NO} \rightarrow \text{products}$                                                                         | $5 \times 10^{-11}$                                    | Atkinson <i>et al.</i> (2005)                |
| $\text{FO} + \text{NO} \rightarrow \text{F} + \text{NO}_2$                                                                            | $2.2 \times 10^{-11}$                                  | Atkinson <i>et al.</i> (2005)                |
| $\text{NO}_3 + \text{CF}_3\text{CFO}_2\text{CF}_3 \rightarrow \text{NO}_2 + \text{CF}_3\text{O} + \text{O}_2$                         | $(0.1 - 6) \times 10^{-13}$                            | varied                                       |
| $\text{NO}_3 + \text{CF}_3\text{O}_2 \rightarrow \text{NO}_2 + \text{CF}_3\text{O} + \text{O}_2$                                      | $6.2 \times 10^{-13}$                                  | this work                                    |
| $\text{NO}_3 + \text{CF}_3\text{O} \rightarrow \text{NO}_2 + \text{CF}_3\text{O}_2$                                                   | $(0.1 - 3.5) \times 10^{-12}$                          | varied                                       |
| $\text{NO}_3 \rightarrow \text{products}$                                                                                             | $0 \text{ s}^{-1}$                                     | determined experimentally                    |

## References

S. M. Aschmann, A. A. Chew, J. Arey, R. Atkinson, *J. Phys. Chem. A*, 1997, 101(43), 8042.

R. Atkinson, *Atmos. Chem. Phys.*, 2003, 3(6), 2233.

R. Atkinson, D. L. Baulch, R. A. Cox, J. N. Crowley, R. F. Hampson, Jr, R. G. Hynes, M. E. Jenkin, J. A. Kerr, M. J. Rossi, J. Troe, *IUPAC Subcommittee on Gas Kinetic Data Evaluation for Atmospheric Chemistry Web Version March 2005*.

M. Bartels, P. Heinemann, K. Hoyerermann, *Symp. Int. Combust. Proc.*, 1985, Volume date 1984, 20, 723.

D. L. Baulch, C. J. Cobos, R. A. Cox, C. Esser, P. Frank, T. Just, J. A. Kerr, M. J. Pilling, J. Troe, R. W. Walker, J. Warnatz, *J. Phys. Chem. Ref. Data*, 1992, 21(3), 411.

T. Beiderhase, W. Hack, K. Hoyerermann, *Z. Phys. Chem.*, 1995, 188(1/2), 227.

P. Biggs, C. E. Canosa-Mas, J.-M. Fracheboud, D. E. Shallcross, R. P. Wayne, *J. Chem. Soc. Faraday Trans.*, 1997, 93(15), 2481.

V. Daële, G. Laverdet, G. Le Bras, G. Poulet, *J. Phys. Chem.*, 1995, 99(5), 1470.

W. B. DeMore, K. D. Bayes, *J. Phys. Chem. A*, 1999, 103(15), 2649.

J. Eberhard, C. J. Howard, *J. Phys. Chem. A*, 1997, 101(18), 3360.

P. Heinemann-Fiedler, K. Hoyerermann, G. Rohde, *Ber. Bunsenges. Phys. Chem.*, 1990, 94(11), 1400.

T. E. Møgelberg, J. Sehested, M. Bilde, T. J. Wallington, O. J. Nielsen, *J. Phys. Chem.*, 1996, 100(21), 8882.

C. Moore, I. W. M. Smith, *J. Chem. Soc. Faraday Trans.*, 1995, 91(18), 3041.

F. L. Nesbitt, J. F. Gleason, L. J. Stief, *J. Phys. Chem. A*, 1999, 103(16), 3038.

O. J. Nielsen, J. Sehested, *Chem. Phys. Lett.*, 1993, 213(5-6), 433.

A. Persky, *Chem. Phys. Lett.*, 2003, 380(3,4), 286.

J. Platz, J. Sehested, O. J. Nielsen, T. J. Wallington, *J. Phys. Chem. A*, 1999, 103(15), 2688.

I. C. Plumb, K. R. Ryan, *Int. J. Chem. Kinet.*, 1981, 13(10), 1011.

P. B. Roussel, P. D. Lightfoot, F. Caralp, V. Catoire, R. Lesclaux, W. Forst, *J. Chem. Soc. Faraday Trans.*, 1991, 87(15), 2367.

D. M. Rowley, P. D. Lightfoot, R. Lesclaux, T. J. Wallington, *J. Chem. Soc. Faraday Trans.*, 1992(a), 88(10), 1369.

D. M. Rowley, R. Lesclaux, P. D. Lightfoot, B. Noziere, T. J. Wallington, M. D. Hurley, *J. Phys. Chem.*, 1992(b), 96(12), 4889.

S. P. Sander, R. R. Friedl, D. M. Golden, M. J. Kurylo, R. E. Huie, V. L. Orkin, G. K. Moortgat, A. R. Ravishankara, C. E. Kolb, M. J. Molina, B. J. Finlayson-Pitts, *NASA Chemical Kinetics and Photochemical Data for Use in Atmospheric Studies, Evaluation Number 14 Update*, 2003.

G. A. Skorobogatov, O. N. Slesar, D. N. Torbin, *Kinetika i Kataliz*, 1986, 27(5), 1055.

A. B. Vakhtin, A. K. Petrov, *Chem. Phys.*, 1991, 149(3), 427.

A. B. Vakhtin, *Int. J. Chem. Kinet.*, 1996, 28(6), 443.

T. J. Wallington, M. D. Hurley, J. Shi, M. M. Maricq, J. Sehested, O. J. Nielsen, T. Ellermann, *Int. J. Chem. Kinet.*, 1993, 25, 651.

B. Wang, C. Fockenberg, *J. Phys. Chem. A*, 2001, 105(37), 8449.

D. Wu, K. D. Bayes, *Int. J. Chem. Kinet.*, 1986, 18(5), 547.

F. Wu, R. W. Carr, *J. Phys. Chem. A*, 2001, 105(9), 1423.
